1 **Title:**

2 The establishment of multiple knockout mutants of *Colletotrichum orbiculare* by CRISPR/Cas9 and  
3 *Cre/loxP* systems

4  
5 **Authors:**

6 Kohji Yamada<sup>1,2\*</sup>, Toya Yamamoto<sup>1</sup>, Kanon Uwasa<sup>1</sup>, Keishi Osakabe<sup>1</sup>, Yoshitaka Takano<sup>3</sup>

7  
8 **Affiliations:**

9 <sup>1</sup> Graduate School of Technology, Industrial and Social Sciences, Tokushima University, Tokushima,  
10 Japan

11 <sup>2</sup> JST, PRESTO, Kawaguchi, Japan

12 <sup>3</sup> Graduate School of Agriculture, Kyoto University, Kyoto, Japan.

13  
14 \*Corresponding author. Email: kohjiyamada226@gmail.com (K.Y.)

15  
16 **Abstract**

17 Phytopathogenic fungi belonging to the *Colletotrichum* genus cause devastating damage for many  
18 plant species. Among them, *Colletotrichum orbiculare* is employed as a model fungus to analyze  
19 molecular aspects of plant-fungus interactions. Although gene disruption via homologous  
20 recombination (HR) was established for *C. orbiculare*, this approach is laborious due to its low  
21 efficiency. Here we developed methods to efficiently generate multiple knockout mutants of *C.*  
22 *orbiculare*. We first found that CRISPR/Cas9 system massively promoted gene-targeting efficiency.  
23 By transiently introducing a CRISPR/Cas9 vector, more than 90 % of obtained transformants were  
24 knockout mutants. Furthermore, we optimized a self-excision *Cre/loxP* marker recycling system for  
25 *C. orbiculare* because limited availability of desired selective markers hampers sequential gene  
26 disruption. In this system, integrated selective marker is removable from the genome via *Cre*  
27 recombinase driven by a xylose-inducible promoter, enabling reuse of the same selective marker for  
28 the next transformation. Using our CRISPR/Cas9 and *Cre/loxP* systems, we attempted to identify  
29 functional sugar transporters in *C. orbiculare*. Multiple disruptions of putative quinate transporter  
30 genes restrict fungal growth on media containing quinate as a sole carbon source, confirming their  
31 functionality as quinate transporters. Our analyses revealed that quinate acquisition is dispensable  
32 during fungal infection because this mutant displayed normal virulence to host plants. In addition, we  
33 successfully built mutations of 17 cellobiose transporter genes in a strain. From the data of knockout  
34 mutants established in this study, we inferred that repetitive rounds of gene disruption using  
35 CRISPR/Cas9 and *Cre/loxP* systems do not cause negative effects for fungal virulence and growth.  
36 Therefore, these systems will be powerful tools to perform systematic gene targeting approach for *C.*

37 *orbiculare*.

38

### 39 **Introduction**

40 The ascomycete genus *Colletotrichum* represents one of economically important phytopathogenic  
41 fungal groups that infect a wide range of plants including commercial crops. Due to their worldwide  
42 occurrence, *Colletotrichum* species are ranked in top 10 important phytopathogenic fungi (1). Of them,  
43 *Colletotrichum orbiculare*, the causal agent of anthracnose on cucurbits, has been employed as a model  
44 fungus to analyze molecular aspects of plant-fungus interactions (2). In molecular biology, functional  
45 analysis of a particular gene often relies on gene manipulation experiments, especially by gene  
46 disruption. Methods of homologous recombination (HR)-based gene replacement were developed for  
47 *C. orbiculare* although these classical procedures are laborious due to its low efficiency. The attempts  
48 to increase HR efficiency in filamentous fungi were reported. Exogenous DNA is thought to be  
49 integrated into a chromosome via DNA repair systems (3). Two distinct pathways are known to repair  
50 double-strand breaks (DSBs): NHEJ pathway which aligns and ligates broken DNA ends without long  
51 homologous sequences and HR pathway which requires sequences homologous with the broken DNA  
52 as a template. Because these two pathways are considered to act independently and competitively,  
53 disruption of NHEJ pathway promoted HR efficiency in many fungi (4–9). On the other hand, DSBs  
54 on targeted loci rarely occur. Therefore, artificial DSB introduction using genome editing technologies  
55 have been applied to promote HR efficiency in fungi. Of genome editing tools, the clustered regularly  
56 interspaced short palindromic repeats (CRISPR) –associated RNA-guided Cas9 endonuclease  
57 becomes the leading tool to recruit nucleases on specific loci to introduce DSBs in various  
58 organisms(10–12). Elevation of HR efficiency using CRISPR/Cas9 system was reported in  
59 filamentous fungi including phytopathogenic fungi such as *Magnaporthe oryzae* (13) and *Botrytis*  
60 *cinerea* (14).

61 In recent years, the genomes of filamentous fungi including *Colletotrichum* species have  
62 been sequenced (15, 16) These studies revealed the presence of an excess of homologous genes,  
63 indicating high degrees of their functional redundancy. Therefore, genes belong to such gene families  
64 need to be disrupted on comprehensive scales to address their cellular functions. However, a limited  
65 number of available selective markers hampers sequential transformations. To circumvent this  
66 problem, marker recycling systems, in which introduced marker genes are removed from the genome,  
67 have been developed. Two recombination systems are primarily used in marker recycling systems, the  
68 bacteriophage P1-derived Cre/*loxP* system (17) and the *Saccharomyces cerevisiae* FLP/*FRT* system  
69 (18). Tyrosine recombinase Cre and FLP binds to *loxP* and *FRT* sequence, respectively, to catalyze  
70 recombination, resulting in excision, insertion, translocation and inversion of DNA fragments. By  
71 optimizing these systems, a marker gene located within *loxP* and *FRT* can be removed by Cre and FLP,  
72 respectively. These approaches were also applied to phytopathogenic fungi such as *Fusarium*

73 *graminearum* (19) and *Ustilago maydis* (20).

74 In this study, we engineered CRISPR/Cas9 system and Cre/*loxP* system to enhance HR-  
75 based gene disruption and to generate multiple knockout (KO) strains, respectively, for *C. orbiculare*.  
76 Especially, we developed a self-excision Cre/*loxP* system to reduce laborious experimental steps to  
77 generate multiple KO strains. In this system, Cre gene fragment is located together with  
78 positive/negative selective markers within two *loxP* sequences, and this marker cassette can be  
79 removed by Cre driven by xylose-inducible promoter. By using these tools, we identified quinate  
80 transporters in *C. orbiculare*. Furthermore, we successfully established mutants lacking 17 cellobiose  
81 transporter genes. Altogether, we believe that these systems will be helpful to perform systematic gene  
82 targeting approach for *C. orbiculare*.

83

## 84 **Results**

### 85 **CRISPR/Cas9 system promotes gene-targeting efficiency in *C. orbiculare***

86 Although HR-based gene targeting has been applied to *C. orbiculare*, its efficiency is low. In this study,  
87 we first tried to promote efficiency of gene targeting by introducing DSBs on the targeted locus via  
88 CRISPR/Cas9 system. To easily evaluate gene-targeting efficiency, *PKSI* gene which encodes  
89 polyketide synthase (21, 22) was disrupted. Because *pks1* strain becomes orange color phenotype due  
90 to a lack of melanin biosynthesis, we can distinguish *pks1* mutants from the wild-type (WT) strain  
91 without PCR-based genotyping (Fig.1A). For gene targeting of *PKSI* gene, we amplified 1 kbp  
92 fragments of 5'- and 3'-flanking sequences of *PKSI* coding region, and fused *hygromycin*  
93 *phosphotransferase* (*HPT*) gene (hygromycin resistance gene) driven by the constitutive *TrpC*  
94 promoter (pCB1636 *pks1*) (Fig.1B). For introducing CRISPR/Cas9 system (pChPtef026 vector),  
95 codon-optimized *Cas9* sequence and gRNA is driven by *Aureobasidium pullulans translation*  
96 *elongation factor 1-alpha* (*tef*) constitutive promoter and *Colletotrichum higginsianum U6* promoter,  
97 respectively (Fig.1B and Fig.S2). Cas9 was C-terminally fused with three-repeated nuclear  
98 localization signals. We designed gRNA sequences from *PKSI* locus and ligated to pChPtef026 vector  
99 (pChPtef026 *pks1*) (Fig.1B and 1C). Disruption of NHEJ pathway, for example by mutating *Lig4* or  
100 *Ku70*, was reported to promote HR efficiency in many fungi (4–9). Although the *lig4* strain of *C.*  
101 *orbiculare* was recently generated and utilized for the gene knockout analysis, (23), HR efficiency of  
102 this strain has not been evaluated yet. Therefore, we co-transformed two plasmids, targeting vector  
103 (pCB1636 *pks1*) and CRISPR/Cas9 vector (pChPtef026 *pks1*), to WT strain (104-T) and *lig4* strain.  
104 Without *PKSI* gRNA in pChPtef026 vector, only one out of five transformants were *pks1* mutants in  
105 WT strain (Fig.1D). On the other hands, three out of seven transformants were *pks1* mutants in *lig4*  
106 strain (Fig.1D). This result suggested that loss of *LIG4* gene improved gene targeting efficiency in *C.*  
107 *orbiculare*. However, this efficiency was lower than expected because disruption of *Ku70* led to much  
108 higher HR efficiency in *C. higginsianum* (4). We next used pChPtef026 vector containing *PKSI*

109 gRNA1 (5'-GTAGGTGTCGACCTCTTGAG-3'). Surprisingly, the number of transformants  
110 markedly increased, and most of them (more than 90 %) were *pks1* mutants in both WT and *lig4* strains  
111 (Fig.1D). On the other hand, the effect of gRNA2 (5'-GATGTCGTAGTGGGTAGCGA-3') on gene  
112 targeting efficiency was limited, compared to gRNA1, suggesting that gRNA sequence largely  
113 influences HR efficiency. In addition, we found that the KO rate using gRNA2 was higher in *lig4* stain  
114 than WT stain, also indicating that disruption of NHEJ pathway facilitates HR-based gene replacement  
115 in *C. orbiculare*.

116 Because pChPtef026 vector does not have any selective markers for *C. orbiculare*, we next  
117 investigated if *Cas9* is integrated into the genome or transiently expressed during transformation. *Cas9*  
118 fragments was detected in three out of ten *pks1* mutants (Fig.1E), indicating that transient *Cas9*  
119 expression is basically sufficient to promote gene-targeting efficiency. Genome integration of  
120 CRISPR/*Cas9* system hampers complementation assay for KO strains. Therefore, we concluded that  
121 this system can be a strong tool for loss-of-function study in in *C. orbiculare*.

122

### 123 **Cre/*loxP* system works in *C. orbiculare***

124 Proteins which share a common evolutionary origin shape groups known as protein families. Due to  
125 their redundant functions, multiple genes in a protein family often need to be disrupted for loss-of-  
126 function study. However, a limited number of available selective markers restricts sequential  
127 transformation in *C. orbiculare*. Previous studies reported that recyclable marker modules allow  
128 repetitive rounds of gene disruption in fungi (20, 24). Therefore, we investigated whether Cre/*loxP*  
129 system-based marker recycling is applicable to *C. orbiculare*. Cre recombinase evicts a DNA fragment  
130 within two 34 bp *loxP* sequences. We constructed the plasmid (pCB1636 lox HPT-TK) in which the  
131 fragment of *HPT-TK* gene, the positive marker *HPT* gene fused with the negative maker *thymidine*  
132 *kinase* (*TK*) gene, driven by *TrpC* promoter is sandwiched with *loxP* sequences (Fig.2A). In Cre/*loxP*  
133 system, single *loxP* sequence is remained in the genome after Cre-based recombination, possibly  
134 causing unfavorable arrangement in the next rounds to build multiple mutations. Therefore, we  
135 employed mutated *loxP* sequences, *lox66* and *lox77* (25). By using these *loxP* sequences, remained  
136 *loxP* sequence becomes inefficient *lox72* sequence. We transformed pCB1636 lox HPT-TK into WT  
137 protoplasts and selected transformants with hygromycin. Sequentially, we transformed pChPtef026 or  
138 pChPtef026 Cre vector in which codon-optimized *Cre* gene is driven by the *tef* promoter, and  
139 incubated transformants with 5-fluoro-2'-deoxyuridine (FdU). Because TK converts FdU to be a toxic  
140 compound, only colonies which do not have *TK* gene are able to grow on PDA media containing FdU.  
141 No colonies were detectable after transforming the vector without *Cre* gene (pChPtef026), indicating  
142 TK-mediated negative selection works in *C. orbiculare* (Fig.2B). On the other hand, colonies became  
143 observable after the introduction of pChPtef026 Cre vector (Fig.2B). We confirmed the removal of  
144 *HPT-TK* fragment using PCR (Fig.2C). Importantly, Cre-introduced strains became sensitive to

145 hygromycin and insensitive to FdU like the WT strain (Fig.2D).

146

### 147 **Optimization of self-excision Cre/loxP systems for *C. orbiculare***

148         These results indicated that Cre/loxP-based marker recycling is applicable to *C. orbiculare*.  
149 However, this system is laborious and time-consuming because two transformation steps, gene  
150 targeting and Cre introduction, are required to disrupt one gene. We next tried to optimize a self-  
151 excision Cre/loxP system for *C. orbiculare*. In this system, Cre gene is also inserted within loxP  
152 sequences, and Cre protein removes Cre gene itself together with HPT-TK gene (Fig.3A). For this  
153 system, an inducible promoter to control Cre expression is required although no inducible promoters  
154 were reported in *C. orbiculare*. Because xylose-inducible promoters were popularly used for marker  
155 recycling systems in fungi (18, 26–28), we investigated xylose-inducibility of previously published  
156 *Penicillium chrysogenum xylP* promoter and *Aspergillus oryzae xynG2* promoter by GFP expression  
157 in *C. orbiculare*. Although both *PcxylP* promoter and *AoxynG2* promoter showed strong GFP  
158 induction on minimal media containing 2 % xylose media as a sole carbon source, GFP fluorescence  
159 was detectable even on PDA media without xylose (Fig.3B). Because leaky Cre expression may cause  
160 a removal of the selective cassette in an inappropriate timing, we attempted to find other promoters  
161 which display weaker basal expression. We searched for xylase genes in *C. orbiculare*, and found two  
162 genes *Cob\_01864* and *Cob\_02882* which are named *xyl1* and *xyl2*, respectively. In *Neurospora crassa*,  
163 the expression of xylase gene is regulated by the transcription activator XLR-1 (29). We found putative  
164 XLR-1 binding sites, GGCTRR and GGNTAAAA (29, 30), in both promoters (Fig.S1), suggesting  
165 their xylose inducibility. We amplified 2 kbp upstream sequences from their coding regions as their  
166 promoters. Putative XLR-1 binding sites were found more in *Coxy11* promoter than *Coxy12* promoter  
167 in this region (Fig.S1). *Coxy11* promoter expectedly showed stronger GFP expression on xylose media  
168 than *Coxy12* promoter (Fig.3B). Importantly, both promoters showed very low basal GFP expression  
169 without xylose (Fig.3B). We employed *Coxy11* promoter to regulate Cre gene. However, we failed to  
170 construct vectors for self-excision Cre/loxP systems likely due to leaky Cre expression in *E. coli*. To  
171 circumvent this problem, an intron-containing Cre gene was previously used (31). We here inserted an  
172 intron of *C. orbiculare histon h4* gene to Cre gene, and named it *Cre\_i*. We confirmed that *Cre\_i*  
173 worked as well as Cre in *C. orbiculare* (Fig.3C).

174         We constructed a self-excision Cre/loxP plasmid to generate *pks1* mutants. After  
175 establishing *pks1* mutants, these *pks1* mutants were grown on minimal media containing xylan or  
176 xylose (Fig.3D). Because xylase plays a role to hydrolyze xylan, *Coxy11* promoter might become more  
177 active in the presence of xylan than xylose. However, *lox72* fragment which is indicative of successful  
178 Cre-based eviction was detectable to a similar extent on both xylan and xylose media (Fig.3D).  
179 Because the presence of glucose leads to inhibition of catabolite processes of other sugars, known as  
180 catabolite repression, we next tested if xylose effect was inhibited on PDA media. Unexpectedly we

181 found that *Cre/loxP* system worked on PDA media containing xylose (PDA+xylose) (Fig.3D). The  
182 presence of other sugars did not restrict xylose inducibility of *CoxyII* promoter. Therefore, minimal  
183 media does not need to be used for Cre induction. On the other hand, *lox72* fragments were also  
184 detectable on PDA media without xylose or xylan in some cases (Fig.3D), indicating that the basal  
185 activity of *CoxyII* promoter was weak but not completely off. *Cre/loxP* fragments was markedly  
186 reduced after 5 days on inducible media. Therefore, we decided to treat fungal strains on PDA+xylose  
187 media for 5 days to remove *Cre/loxP* cassette.

188 The conidia, harvested from *pks1* mutants after grown for 5 days on PDA+xylose media,  
189 were streaked on PDA containing FdU to pick up single colonies which do not have the *Cre/loxP*  
190 cassette. We named this strain *pks1 lox72*. Although these strains showed orange color *pks1* phenotype,  
191 they lost hygromycin resistance (Fig.3E). These results indicates that self-excision *Cre/loxP* system  
192 for *C. orbicularre* was successfully established.

193 We next tried to improve this system towards being more easily handled and efficient for  
194 establishing multiple mutants. Because this self-excision *Cre/loxP* fragment is a bit too long to be  
195 handled for plasmid construction, we attempted to reduce this fragment size. We investigated if a  
196 shorten *CoxyII* promoter (650 bp) containing several putative XLR-1 binding sites was also functional  
197 for Cre induction on PDA+xylose media. Eviction efficiency seemed to be slightly reduced in the 650  
198 bp *CoxyII* promoter compared to 2kbp one (Fig.4A). However, because *Cre/loxP* system surely  
199 worked, we employed this shorten version of *CoxyII* promoter for our self-excision *Cre/loxP* system.

200 For constructing targeting vectors, we fused a *Cre/loxP* fragment with homologous arms by  
201 PCR, and inserted into pCB1636 vector. We next tested whether this PCR fragment can directly be  
202 used as a DNA donar for gene targeting (Fig.4B). We prepared two fragments, *TrpC* promoter *HPT*  
203 gene fragment (3.4 kbp) and *Cre/loxP* cassette (7 kbp), to investigate whether PCR fragment size  
204 affects gene-targeting efficiency; both fragments contain 1kbp 5'- and 3'-*PKSI* homology arms. We  
205 introduced these PCR fragments with the CRISPR/Cas9 vector pChPtef026 containing *PKSI* gRNA1  
206 to *C. orbicularre* protoplasts. As a results, the direct introduction of a PCR fragment was sufficient to  
207 generate *pks1* mutants with high efficiency (Fig.4B). In addition, high mutation rates were observed  
208 using both PCR fragments.

209 It takes more than 10 days for the marker recycling step including Cre induction on xylose  
210 media and negative selection for *Cre/loxP* cassette using FdU. To reduce the amount of time for  
211 multiple gene disruption, we also generated another self-excision *Cre/loxP* cassette using bialaphos  
212 resistance gene (*Bar*) (Fig.4C). Multi-marker recycling system was reported to accelerate gene  
213 disruption in *Candida albicans* (31). Because multi-marker system was used for generating  
214 homozygous mutants in the diploid fungus *C. albicans* (31), we can establish double KO mutants in  
215 the haploid fungus *C. orbicularre* by using multi-marker system. After generating KO strains with  
216 hygromycin selection cassette, another gene can be sequentially targeted using bialaphos selection



217 cassette. Cre can remove Cre/*loxP* cassettes from two loci in this double KO mutant.

218

### 219 **Sugar amounts in plants are altered during infection of *C. orbiculare***

220 Phytopathogens acquire host-derived sugars during infections (32, 33). We previously reported that  
221 *Arabidopsis* plants activate a sugar influx transporter to avoid pathogens' sugar gain (34), revealing  
222 the importance of sugars in plant-pathogen interactions. In this study, to investigate what kinds of  
223 sugars *C. orbiculare* obtains from plants during infection, we attempted to identify sugar transporters  
224 involved in virulence of *C. orbiculare*. First of all, we measured sugar amounts in infected leaves. *C.*  
225 *orbiculare* is reported to infect not only *Cucumis sativus* but also *Nicotiana benthamiana* (35).  
226 Therefore, we monitored sugar amounts at 1, 3, 6 and 7 days post infection on true leaves of  
227 *N.benthamiana* and cotyledons of *C. sativus* (Fig.5A and 5B). We found that quinate amounts  
228 increased in *N.benthamiana* leaves although it was reduced in cucumber cotyledons (Fig.5C and 5D).  
229 On the other hand, cellobiose amounts were elevated in both plants during fungal infection (Fig.5C  
230 and 5D).

231

### 232 **Identification of quinate transporters in *C. orbiculare***

233 The expression of putative *C. orbiculare* quinate transporters was previously reported to be induced  
234 during the infection on *N. benthamiana* leaves (35). Therefore, we hypothesized that *C. orbiculare*  
235 acquires quinate during infection especially on *N.benthamiana*. To analyze this hypothesis, we  
236 investigated virulence of quinate transporter KO strains of *C. orbiculare*. The quinate transporter qa-  
237 y was identified in *N. crassa* (36). We found that five qa-y homologous genes in *C. orbiculare* (Fig.6A).  
238 By using our self-excision Cre/*loxP* system, we established multiple knockout mutants which were  
239 deficient of five quinate transporters (Fig.6B). Although mutant strains lacking *Cob\_06838* and/or  
240 *Cob\_05142* showed normal growth on minimal media containing quinate as a sole carbon source, the  
241 growth of the quadruple mutant defective of *Cob\_06838*, *Cob\_05142*, *Cob\_05165* and *Cob\_06690*  
242 and the quintuple mutant lacking all putative quinate transporters was impaired on quinate media.  
243 Importantly, the quadruple and the quintuple mutants normally grew on media containing glucose as  
244 a carbon source (Fig.6C), confirming their functionality as quinate transporters in *C. orbiculare*.  
245 However, loss of these quinate transporters did not affect fungal virulence to *N. benthamiana* or *C.*  
246 *sativus* (Fig.6E). We further found five other genes showing high homology with quinate transporters.  
247 These genes were homologs with the *N. crassa* galacturonic acid transporters GAT-1 (37) and the  
248 *Botrytis cinerea* hxt15 (38) (Fig.6A). To further analyze the contribution of these transporter genes on  
249 virulence of *C. orbiculare*, we generated decuple mutants which are deficient of five quinate  
250 transporters and five galacturonic acid transporters (Fig.6B). However, this strain showed normal  
251 growth on media containing galacturonic acid or pectin as a carbon source (Fig.6D), indicating the  
252 presence of other galacturonic acid transporters in *C. orbiculare*. In addition, virulence of this decuple

253 mutant was not altered on *N. benthamiana* or *C. sativus* (Fig.6E).

254 Because cellobiose amounts were elevated during infection on *N. benthamiana* and *C.*  
255 *sativus* (Fig.5C and 5D), we also analyzed contribution of cellobiose transporters to virulence of *C.*  
256 *orbiculare*. We found that 26 genes which show higher homology with CDT-1 and CDT-2 which are  
257 previously characterized as cellobiose transporters in *N. crassa* (39) (Fig.7A). Out of these 26 putative  
258 cellobiose transporters, 17 genes were knocked out using our self-excision Cre/*loxP* system in this  
259 study (Fig.7B). This heptadecuple mutant showed normal virulence on *N. benthamiana* and *C. sativus*  
260 (Fig.7C). In addition, this mutant strain was still able to grow on media containing cellobiose as a sole  
261 carbon source, suggesting redundant functions of remained 9 genes as cellobiose transporters (Fig. 7D).

262

## 263 Discussion

264 Although *C. orbiculare* has been employed as a model phytopathogenic fungus to analyze molecular  
265 mechanisms in plant-fungus interactions, sequential gene disruption was technically difficult. Because  
266 there are only a few desired selective markers for *C. orbiculare*, we applied Cre/*loxP*-based marker  
267 recycling system to this fungus in this study. Previously, the establishment of *URA3*-based marker  
268 recycling system was reported in *C. orbiculare* (40). The *URA3* gene encodes an orotidine-5-  
269 phosphate decarboxylase involved in uridine/uracil synthesis. *C. orbiculare* has two *URA3* genes,  
270 *URA3A* and *URA3B*, in the genome. The *ura3a/b* double mutants showed auxotrophy for uridine and  
271 insensitivity to 5-fluoroorotic acid (5-FOA). In background of the *ura3a/b* mutants, *URA3B* can be  
272 used as a selective marker for transformation under conditions without exogenous application of  
273 uridine because the introduction of *URA3B* provides prototrophy to *ura3a/b* mutants. Importantly, this  
274 *URA3B* selective marker cassette is removable when the transformants are incubated on PDA  
275 containing 5-FOA and uridine. However, because *ura3a/b* mutants lost virulence, *URA3B* gene needs  
276 to be re-introduced after *URA3B* removal step to analyze fungal virulence. As advantageous points of  
277 our Cre/*loxP* system from *URA3*-based system, our system is applicable to WT strains. In addition,  
278 we can prepare two positive selection markers, *HPT* and *Bar*. This multi-marker recycling system  
279 accelerates to generate multiple KO mutants by reducing the number of times of marker recycling  
280 steps. However, one *loxP* sequence is remained in the genome as a result of Cre-based recombination,  
281 possibly causing unfavorable recombination in the next excision rounds. To circumvent this risk,  
282 mutated *loxP* sequences, *lox66* and *lox77*(25), were used. After Cre-based recombination, inefficient  
283 *lox72* sequence is remained by using *lox66* and *lox77*. Here we disrupted 17 cellobiose transporter  
284 genes using this system, and did not observe any negative effects for fungal growth and virulence.  
285 These results suggested that unfavorable recombination caused by remained *lox72* sequences did not  
286 occur in our Cre/*loxP* system.

287 To obtain marker-free mutants, we also examined if CRISPR/Cas9-induced DSBs can  
288 directly introduce mutations on *PKSI* locus without donor DNAs because small insertions and/or



289 deletions can be generated by the error-prone NHEJ pathway (41). However, we had never obtained  
290 *pks1* mutants without donor DNAs (data not shown). Likewise it was reported that this event rarely  
291 occur in *M.oryzae* (42). However, co-introduction of a telomere vector with CRISPR/Cas9 RNPs  
292 efficiently generated NHEJ-mediated mutations in *M.oryzae* (43). While such kinds of marker-free  
293 systems might be also developed for *C. orbiculare* near future, we thought that HR-based gene  
294 replacement with marker recycling systems is currently the most practical to build multiple mutations  
295 in *C. orbiculare*. Although disruption of NHEJ pathway massively promotes HR efficiency in *C.*  
296 *higginsianum* and other fungi (4–6), loss of *LIG4* only slightly enhanced it in *C. orbiculare* under our  
297 experimental conditions (Fig.1D). However, gene-targeting efficiency using an inefficient gRNA was  
298 elevated in the absence of *LIG4* (Fig.1D). Therefore, we employed the combination between  
299 CIRSPR/Cas9 system and *lig4* strain to generate KO strains in this study.

300 We previously described that plants activate a sugar influx transporter to inhibit pathogens'  
301 sugar gain (34). Loss of sugar transporters causes enhanced susceptibility to pathogenic bacteria and  
302 fungi in *Arabidopsis* plants (34, 44), indicating that sugar uptake competition is important to shape  
303 plant-pathogen interactions. We found that quinate amounts were elevated during the infection of *C.*  
304 *orbiculare* in *N. benthamiana* leaves, but not in *C. sativa* cotyledons (Fig.5C and 5D). These results  
305 suggested that *C. orbiculare* differently affects host sugar metabolism in a dependent manner on host  
306 plant species. During *M. oryzae* infection, quinate amounts were also elevated in infected plants (45).  
307 *M. oryzae* might manipulate host quinate concentrations by modulating shikimate pathway to reduce  
308 defensive phenylpropanoid metabolism. In addition, quinate can be used as a carbon source by fungi  
309 such as *N. crassa* (36). Because we also showed that *C. orbiculare* can use quinate as a carbon source  
310 (Fig.6C), we thought that *C. orbiculare* exploits elevated amounts of quinate as a carbon source during  
311 infection. However, loss of quinate transporters did not affect fungal virulence although it reduced  
312 fungal growth on media containing quinate as a sole carbon source (Fig.6E). These results revealed  
313 that quinate uptake is dispensable for virulence of *C. orbiculare*.

314 We also found that cellobiose amounts increased during fungal infection in *N. benthamiana*  
315 and *C. sativus* (Fig.5C and 5D). Cellobiose is generated by decaying cellulose, a major cell wall  
316 component. Leaves became necrotic during fungal infection (Fig.5A and 5B), likely reflecting the  
317 amounts of cellobiose. Because many putative cellobiose transporters were found in the genome in *C.*  
318 *orbiculare*, this fungus may acquire cellobiose during infection. At least we showed that *C. orbiculare*  
319 can exploit cellobiose as a carbon source (Fig.7D). Recently, the sugar transporter Hxk6 was identified  
320 to be involved in virulence of *C. higginsianum* (46). Although ChHxk6 showed monosaccharide uptake  
321 activity in yeast, it was indeed a homolog of cellobiose transporters. Therefore, cellobiose uptake  
322 might be a key for virulence of *C. higginsianum* although cellobiose uptake activity of ChHxk6 was  
323 not analyzed yet. We here mutated Cob\_07787 which is the closest homolog of ChHxk6 in *C.*  
324 *orbiculare*. However, the mutant strain did not show reduced virulence (Fig.7C). Because the mutant

325 was able to grow on media containing cellobiose as a sole carbon source (Fig.7D), remained intact  
326 cellobiose transporters could redundantly work for cellobiose absorption. Therefore, further genetic  
327 study is required to analyze the importance of cellobiose uptake in fungal virulence. In addition, these  
328 results indicate the requirement of comprehensive gene-targeting approaches for loss-of-function  
329 study.

330 Phytopathogens have evolved various strategies to overcome plant immunity, including the  
331 use of effectors which suppress their host's immune system. The genomes of many phytopathogenic  
332 fungi including *Colletotrichum* species have been reported, and these studies revealed the presence of  
333 multiple effector proteins (35). In most cases, effector proteins work redundantly to repress the same  
334 host proteins, indicating that multiple gene targeting methods are required to analyze their functions.  
335 In *U.maydis*, FLP/FRT system is applied to mutate multiple effector genes (20). We believe that  
336 CRISPR/Cas9 and Cre/loxP systems, we here developed, will become powerful tools for genetic  
337 studies to discover novel aspects in plant-fungus interactions.

338

## 339 **Materials and Methods**

### 340 **Strains, culture conditions and infection assays**

341 *C. orbiculare* strain 104-T (MAFF240422) was used as the WT strain in this study. *lig4* strain was  
342 previously established by disrupting *LIG4* gene in 104-T strain (47). Fungal strains were incubated on  
343 PDA medium (Nissui) or minimal medium (1.6 g/L yeast nitrogen base without amino acids (BD), 2  
344 g/L asparagine (Wako), 1 g/L ammonium nitrate (Nacalai tesque), 15 g/L agar (Nacalai tesque))  
345 containing 2 % indicated sugars at 24 °C under dark conditions. Selective agents were used at a final  
346 concentration of 100 µg/mL for hygromycin (Wako), 25 µg/mL for bialaphos (Wako), or 100 µM for  
347 2'-deoxy-5-fluorouridine (FdU) (Tokyo Chemical Industry). For infection assays, true leaves from 3-  
348 or 4-week-old *N. benthamiana* or cotyledons of 1-week-old *C. sativa* were used. Five µL of  $5.0 \times 10^5$   
349 spores was dropped on detached leaves, and incubated in sealed dishes with wet paper for keeping  
350 humidity at 24 °C under 16 h light / 8 h dark cycle.

351

### 352 **Plasmid construction**

353 The detailed information of plasmids used in this study are described in Fig.S2. For pChPtef026 vector,  
354 DNA fragments of the *C. higginsianum* U6 snRNA gene promoter with gRNA scaffold, the *A.*  
355 *melanogenum translation elongation factor 1-alpha (tef)* gene promoter, the fungal codon-optimized  
356 *Cas9* gene, and the *Agaricus bisporus heat shock protein 26 kDa (HSP26)* gene terminator, were  
357 synthesized by GenScript. Synthesized gene fragments were assembled and clone into the  
358 *ApaI/EcoRV* sites of pDONR221(Thermo Fisher Scientific) by using T4 DNA ligase (NEB) or In-  
359 Fusion HD-Cloning kit (Clontech). For inserting a gRNA fragment, annealed oligoDNA was ligated  
360 into *BsaI*-digested pChPtef026 vector using T4 DNA ligase. For pChPtef026 Cre vector, fungal codon-

361 optimized *Cre* gene, synthesized by FASMAC, was inserted to the *NcoI/SacI* sites of pChPtef026  
362 vector to replace *Cas9* with *Cre*. For pCB1636 *pksl* vector, 1 kbp upstream sequence from the start  
363 codon of *PKS1* and 1 kbp downstream sequence from stop codon of *PKS1* were assembled into the  
364 *XhoI/SalI* sites and the *ClaI/HindIII* sites of pCB 1636 vector (2), respectively, by SLiCE reaction  
365 (48). For pCB1636 lox HPT-TK, DNA fragments of *lox66*, *TrpC* promoter, fungal codon-optimized  
366 *hygromycin phosphotransferase (HPT)* gene, fungal codon-optimized *thymidine kinase (TK)* gene and  
367 *lox71* were synthesized by FASMAC. These fragments were assembled to the *SalI/ClaI* sites of  
368 pCB1636 vector by SLiCE reaction. For pCB636 *pksl* lox HPT-TK, 1 kbp upstream sequence from  
369 the start codon of *PKS1* and 1 kbp downstream sequence from stop codon of *PKS1* were assembled  
370 into the *XhoI/SalI* sites and the *ClaI/HindIII* sites of pCB1636 lox HPT-TK vector, respectively, by  
371 SLiCE reaction. For pCB *pksl* clox HPT-TK, a *CoxyII* promoter fragment was amplified from genome  
372 of *C. orbiculare*. *Cre*, *CoxyII* promoter and *AbHSP26* terminator were assembled into the *NheI/AscI*  
373 sites of pCB1636 *pksl* lox HPT-TK vector. For pCB1636 *pksl* clox Bar-TK, *HPT* gene of pCB *pksl*  
374 clox HPT-TK vector was replaced with bialaphos resistance (*Bar*) gene by PCR. For gene disruption  
375 of transporter genes, 1 or 0.5 kbp fragments of upstream from start codon and 1 or 0.5 kbp fragments  
376 of downstream from stop codon were amplified from genome of *C. orbiculare*. Self-excision *Cre/loxP*  
377 cassette was amplified from pCB1636 *pksl* clox HPT-TK vector or pCB1636 *pksl* clox Bar-TK vector.  
378 Three fragments (two homologous arms and one marker cassette) were fused by PCR (49). A fused  
379 DNA fragment was inserted into the *XhoI/HindII* sites of pCB1636 vector. All DNA fragments were  
380 amplified by KOD one (TOYOBO).

381

### 382 **Fungal transformation**

383 PEG-mediated fungal transformation, which was previously described (2), was applied to introduce  
384 plasmids or PCR fragments to *C. orbiculare* protoplasts. Protoplasts were prepared by degrading cell  
385 wall via driselase (Sigma) and lysing enzyme (Sigma). Ten µg of plasmids or PCR fragments was used  
386 for transformation. Transformants were selected on PDA with 0.6 M glucose containing appropriate  
387 anti-biotics for 5-7 days. HR efficiency of *pksl* mutants was calculated at this time without PCR-based  
388 genotyping. Transformants were further transferred onto PDA medium with appropriate anti-biotics  
389 for several days. For genotyping PCR, mycelium was picked into 100 µL TE buffer and microwaved  
390 for 5 min twice. After centrifugation, supernatant was used as a template. For removing the selective  
391 marker cassette of self-excision *Cre/loxP* system, KO strains were transferred onto PDA medium  
392 containing 2 % xylose for 5 days. Conidia were harvested and streaked onto PDA media containing  
393 FdU. After a few days, single colonies were picked and transferred onto PDA medium containing FdU.  
394 For checking a removal of the selective marker cassette, genotyping of transformants were performed  
395 by the above-described method. In addition, transformants were transferred onto PDA medium  
396 containing appropriate selective agents to check whether they lost the resistance against the anti-biotics.

397

### 398 **Measurement of sugar content in infected leaves**

399 *C. orbiculare*-infected leaves were frozen and ground in liquid nitrogen, and homogenized with 1 ml  
400 of extraction buffer (methanol:water:chloroform = 5:2:2) with 10 µg ribitol (Wako) as an internal  
401 control. Mixtures were incubated for 30 min at 37 °C. After centrifugation, 900 µl of the supernatant  
402 was transferred to a new tube, and 400 µl of water was added. After centrifugation, the upper phase  
403 was transferred to new tube. These samples were evaporated using a spin dryer at 50 °C, and  
404 subsequently freeze-dried. Samples were sonicated in 30 µl of methoxyamine (Sigma) (20 mg/ml  
405 dissolved in pyridine (Wako)), and incubated for 90 min at 30 °C. Subsequently, 30 µl of MSTFA +  
406 1% TMCS (Thermo Fisher Scientific) was added and incubation was continued for 30 min at 37 °C.  
407 After centrifugation, the supernatants were subjected to gas chromatography–mass spectrometry  
408 analysis. Each sample (1 µl) was separated on a gas chromatograph (7820A; Agilent Technologies)  
409 combined with a mass spectrometric detector (5977B; Agilent Technologies). For quantitative  
410 determination of metabolites, peaks that originated from selected ion chromatograms (quinic 345,  
411 cellobiose 361, ribitol 319) were used.

412

### 413 **Acknowledgements**

414 We thank Dr. Ryo Matsumoto (Tokushima University) for technical assistance, Prof. Yuriko Osakabe  
415 (Tokyo Institute of Technology) for discussion, and Prof. Katsuya Gomi (Tohoku University) for  
416 providing published materials. This work was supported by JST PRESTO (JPMJPR17Q9, K.Y.) and  
417 JSPS KAKENHI (20K21280, 21H02157, K.Y.; 21H05032, Y.T.).

418

### 419 **Author contributions**

420 K.Y. and Y.T. conceived this study. K.Y. performed most experiments and data analyses. T.Y. and K.U.  
421 performed gene disruption analysis. K.O. provided plasmid vectors. K.Y. wrote the manuscript.

422

### 423 **References**

- 424 1. R. Dean, J. A. L. Van Kan, Z. A. Pretorius, K. E. Hammond-Kosack, A. Di Pietro, P. D. Spanu, J.  
425 J. Rudd, M. Dickman, R. Kahmann, J. Ellis, G. D. Foster, The Top 10 fungal pathogens in  
426 molecular plant pathology. *Mol. Plant Pathol.* **13**, 414–430 (2012).
- 427 2. H. Irieda, H. Maeda, K. Akiyama, A. Hagiwara, H. Saitoh, A. Uemura, R. Terauchi, Y. Takano,  
428 *Colletotrichum orbiculare* secretes virulence effectors to a biotrophic interface at the primary  
429 hyphal neck via exocytosis coupled with SEC22-mediated traffic. *Plant Cell.* **26**, 2265–2281  
430 (2014).
- 431 3. M. Shrivastav, L. P. De Haro, J. A. Nickoloff, Regulation of DNA double-strand break repair  
432 pathway choice. *Cell Res.* **18**, 134–147 (2008).

- 433 4. T. Ushimaru, H. Terada, K. Tsuboi, Y. Kogou, A. Sakaguchi, G. Tsuji, Y. Kubo, Development of  
434 an efficient gene targeting system in *Colletotrichum higginsianum* using a non-homologous end-  
435 joining mutant and *Agrobacterium tumefaciens*-mediated gene transfer. *Mol. Genet. Genomics*.  
436 **284**, 357–371 (2010).
- 437 5. X. Qi, X. Su, H. Guo, J. Qi, H. Cheng, A ku70 null mutant improves gene targeting frequency in  
438 the fungal pathogen *Verticillium dahliae*. *World J. Microbiol. Biotechnol.* **31**, 1889–1897 (2015).
- 439 6. N. Y. S. K. I. C. H. Inoue, Highly efficient gene replacements in *Neurospora* strains deficient for  
440 nonhomologous end-joining. *Proc Natl Acad Sci U S A.* **101**, 12248–12253 (2004).
- 441 7. F. Villalba, J. Collemare, P. Landraud, K. Lambou, V. Brozek, B. Cirer, D. Morin, C. Bruel, R.  
442 Beffa, M. H. Lebrun, Improved gene targeting in *Magnaporthe grisea* by inactivation of MgKU80  
443 required for non-homologous end joining. *Fungal Genet. Biol.* **45**, 68–75 (2008).
- 444 8. T. Takahashi, T. Masuda, Y. Koyama, Enhanced gene targeting frequency in ku70 and ku80  
445 disruption mutants of *Aspergillus sojae* and *Aspergillus oryzae*. *Mol. Genet. Genomics.* **275**, 460–  
446 470 (2006).
- 447 9. K. Ishibashi, K. Suzuki, Y. Ando, C. Takakura, H. Inoue, Nonhomologous chromosomal  
448 integration of foreign DNA is completely dependent on MUS-53 (human Lig4 homolog) in  
449 *Neurospora*. *Proc. Natl. Acad. Sci. U. S. A.* **103**, 14871–14876 (2006).
- 450 10. R. Song, Q. Zhai, L. Sun, E. Huang, Y. Zhang, Y. Zhu, Q. Guo, Y. Tian, B. Zhao, H. Lu,  
451 CRISPR/Cas9 genome editing technology in filamentous fungi: progress and perspective. *Appl.*  
452 *Microbiol. Biotechnol.* **103**, 6919–6932 (2019).
- 453 11. M. Schuster, R. Kahmann, CRISPR-Cas9 genome editing approaches in filamentous fungi and  
454 oomycetes. *Fungal Genet. Biol.* **130**, 43–53 (2019).
- 455 12. N. Wada, R. Ueta, Y. Osakabe, K. Osakabe, Precision genome editing in plants: State-of-the-art  
456 in CRISPR/Cas9-based genome engineering. *BMC Plant Biol.* **20**, 1–12 (2020).
- 457 13. T. Arazoe, K. Miyoshi, T. Yamato, T. Ogawa, S. Ohsato, T. Arie, S. Kuwata, Tailor-made  
458 CRISPR/Cas system for highly efficient targeted gene replacement in the rice blast fungus.  
459 *Biotechnol. Bioeng.* **112**, 2543–2549 (2015).
- 460 14. T. Leisen, F. Bietz, J. Werner, A. Wegner, U. Schaffrath, D. Scheuring, F. Willmund, A.  
461 Mosbach, G. Scalliet, M. Hahn, CRISPR/Cas with ribonucleoprotein complexes and transiently  
462 selected telomere vectors allows highly efficient marker-free and multiple genome editing in  
463 *Botrytis cinerea*. *PLoS Pathog.* **16**, 1–32 (2020).
- 464 15. R. J. O. Connell, M. R. Thon, S. Hacquard, S. G. Amyotte, J. Kleemann, M. F. Torres, U. Damm,  
465 E. A. Buiate, L. Epstein, N. Alkan, J. Altmüller, L. Alvarado-balderrama, C. A. Bauser, C.  
466 Becker, B. W. Birren, Z. Chen, J. Choi, J. A. Crouch, J. P. Duvick, M. A. Farman, P. Gan, D.  
467 Heiman, B. Henrissat, R. J. Howard, M. Kabbage, C. Koch, B. Kracher, Y. Kubo, A. D. Law, M.  
468 Lebrun, Y. Lee, I. Miyara, N. Moore, U. Neumann, K. Nordström, D. G. Panaccione, R.



- 469 Panstruga, M. Place, R. H. Proctor, D. Prusky, G. Rech, R. Reinhardt, J. A. Rollins, S. Rounsley,  
470 C. L. Schardl, D. C. Schwartz, N. Shenoy, K. Shirasu, U. R. Sikhakolli, K. Stüber, S. A. Sukno, J.  
471 A. Sweigard, Y. Takano, H. Takahara, F. Trail, H. C. Van Der Does, L. M. Voll, I. Will, S.  
472 Young, Q. Zeng, J. Zhang, S. Zhou, M. B. Dickman, P. Schulze-iefert, E. Ver, L. Van Themaat,  
473 L. Ma, L. J. Vaillancourt, Lifestyle transitions in plant pathogenic Colletotrichum fungi  
474 deciphered by genome and transcriptome analyses. *Nat. Genet.* **44**, 1060–1065 (2012).
- 475 16. P. Gan, A. Tsushima, M. Narusaka, Y. Narusaka, Y. Takano, Y. Kubo, K. Shirasu, Genome  
476 sequence resources for four phytopathogenic fungi from the colletotrichum orbiculare species  
477 complex. *Mol. Plant-Microbe Interact.* **32**, 1088–1090 (2019).
- 478 17. D. Delneri, G. C. Tomlin, J. L. Wixon, A. Hutter, M. Sefton, E. J. Louis, S. G. Oliver, Exploring  
479 redundancy in the yeast genome: An improved strategy for use of the cre-loxP system. *Gene.* **252**,  
480 127–135 (2000).
- 481 18. K. Kopke, B. Hoff, U. Kuck, Application of the saccharomyces cerevisiae FLP/FRT  
482 recombination system in filamentous fungi for marker recycling and construction of knockout  
483 strains devoid of heterologous genes. *Appl. Environ. Microbiol.* **76**, 4664–4674 (2010).
- 484 19. K. Twaruschek, P. Spörhase, H. Michlmayr, G. Wiesenberger, G. Adam, New plasmids for  
485 Fusarium transformation allowing positive-negative selection and efficient Cre-loxP mediated  
486 marker recycling. *Front. Microbiol.* **9**, 1–14 (2018).
- 487 20. Y. Khrunyk, K. Münch, K. Schipper, A. N. Lupas, R. Kahmann, The use of FLP-mediated  
488 recombination for the functional analysis of an effector gene family in the biotrophic smut fungus  
489 Ustilago maydis. *New Phytol.* **187**, 957–968 (2010).
- 490 21. Y. Takano, Y. Kubo, K. Shimizu, K. Mise, T. Okuno, I. Furusawa, Structural analysis of PKS1 , a  
491 polyketide synthase gene involved in melanin biosynthesis in Colletotrichum lagenarium. *Mol.*  
492 *Genet. Genomics*, 162–167 (1995).
- 493 22. Y. Kubo, H. Nakamura, K. Kobayashi, T. Okuno, I. Furusawa, Cloning of a melanin biosynthetic  
494 gene essential for appressorial penetration of Colletotrichum lagenarium. *Mol. Plant-Microbe*  
495 *Interact.* **4**, 440–445 (1991).
- 496 23. R. Zhang, N. Isozumib, M. Mori, R. Okuta, S. Singkaravanit-Ogawa, T. Imamura, P. Gan, K.  
497 Shirasu, S. Ohki, Y. Takano, *bioRxiv*, in press.
- 498 24. S. Krappmann, Ö. Bayram, G. H. Braus, Deletion and allelic exchange of the Aspergillus  
499 fumigatus veA locus via a novel recyclable marker module. *Eukaryot. Cell.* **4**, 1298–1307 (2005).
- 500 25. H. Albert, E. C. Dale, E. Lee, D. W. Ow, Site-specific integration of DNA into wild-type and  
501 mutant lox sites placed in the plant genome. *Plant J.* **7**, 649–659 (1995).
- 502 26. E. Szewczyk, T. Kasuga, Z. Fan, A new variant of self-excising  $\beta$ -recombinase/six cassette for  
503 repetitive gene deletion and homokaryon purification in Neurospora crassa. *J. Microbiol.*  
504 *Methods.* **100**, 17–23 (2014).

- 505 27. S. Zhang, A. Ban, N. Ebara, O. Mizutani, M. Tanaka, T. Shintani, K. Gomi, Self-excising  
506 Cre/mutant lox marker recycling system for multiple gene integrations and consecutive gene  
507 deletions in *Aspergillus oryzae*. *J. Biosci. Bioeng.* **123**, 403–411 (2017).
- 508 28. M. Blatzer, F. Gsaller, B. Abt, M. Schrettl, T. Specht, H. Haas, An endogenous promoter for  
509 conditional gene expression in *Acremonium chrysogenum*: The xylan and xylose inducible  
510 promoter xyl1P. *J. Biotechnol.* **169**, 82–86 (2014).
- 511 29. J. Sun, C. Tian, S. Diamond, N. Louise Glassa, Deciphering transcriptional regulatory  
512 mechanisms associated with hemicellulose degradation in *Neurospora crassa*. *Eukaryot. Cell.* **11**,  
513 482–493 (2012).
- 514 30. M. R. Andersen, W. Vongsangnak, G. Panagiotou, M. P. Salazar, L. Lehmann, J. Nielsen, A  
515 trispecies *Aspergillus* microarray: Comparative transcriptomics of three *Aspergillus* species.  
516 *Proc. Natl. Acad. Sci. U. S. A.* **105**, 4387–4392 (2008).
- 517 31. S. Shahana, D. S. Childers, E. R. Ballou, I. Bohovych, F. C. Odds, N. A. R. Gow, A. J. P. Brown,  
518 New Clox systems for rapid and efficient gene disruption in *Candida albicans*. *PLoS One.* **9**, 15–  
519 19 (2014).
- 520 32. R. Wahl, K. Wippel, S. Goos, J. K??mper, N. Sauer, A novel high-affinity sucrose transporter is  
521 required for virulence of the plant pathogen *Ustilago maydis*. *PLoS Biol.* **8** (2010),  
522 doi:10.1371/journal.pbio.1000303.
- 523 33. Q. Chang, X. Lin, M. Yao, P. Liu, J. Guo, L. Huang, R. T. Voegelé, Z. Kang, J. Liu, Hexose  
524 transporter PsHXT1-mediated sugar uptake is required for pathogenicity of wheat stripe rust.  
525 *Plant Biotechnol. J.* **18**, 2367–2369 (2020).
- 526 34. K. Yamada, Y. Saijo, H. Nakagami, Y. Takano, Regulation of sugar transporter activity for  
527 antibacterial defense in *Arabidopsis*. *Science (80-. ).* **354**, 1427–1430 (2016).
- 528 35. P. Gan, K. Ikeda, H. Irieda, M. Narusaka, R. J. O’Connell, Y. Narusaka, Y. Takano, Y. Kubo, K.  
529 Shirasu, Comparative genomic and transcriptomic analyses reveal the hemibiotrophic stage shift  
530 of *Colletotrichum fungi*. *New Phytol.* **197**, 1236–1249 (2013).
- 531 36. N. H. Giles, M. E. Case, J. Baum, R. Geever, L. Huiet, V. Patel, B. Tyler, Gene organization and  
532 regulation in the qa (quinic acid) gene cluster of *Neurospora crassa*. *Microbiol. Rev.* **49**, 338–358  
533 (1985).
- 534 37. J. P. Benz, R. J. Protzko, J. M. S. Andrich, S. Bauer, J. E. Dueber, C. R. Somerville, Identification  
535 and characterization of a galacturonic acid transporter from *Neurospora crassa* and its application  
536 for *Saccharomyces cerevisiae* fermentation processes. *Biotechnol. biofu.* **7** (2014).
- 537 38. L. Zhang, C. Hua, J. H. M. Stassen, S. Chatterjee, M. Cornelissen, J. A. L. van Kan, Genome-  
538 wide analysis of pectate-induced gene expression in *Botrytis cinerea*: Identification and functional  
539 analysis of putative d-galacturonate transporters. *Fungal Genet. Biol.* **72**, 182–191 (2014).
- 540 39. Galazka JM, T. C, B. WT, M. B, G. NL, C. JH, Cellodextrin transport in yeast for improved

- 541 biofuel production. *Science* (80-. ). **330**, 801–804 (2010).
- 542 40. N. Kumakura, A. Ueno, K. Shirasu, Establishment of a selection marker recycling system for  
543 sequential transformation of the plant-pathogenic fungus *Colletotrichum orbiculare*. *Mol. Plant*  
544 *Pathol.* **20**, 447–459 (2019).
- 545 41. C. Xue, E. C. Greene, DNA Repair Pathway Choices in CRISPR-Cas9-Mediated Genome  
546 Editing. *Trends Genet.* **37**, 639–656 (2021).
- 547 42. A. J. Foster, M. Martin-Urdiroz, X. Yan, H. S. Wright, D. M. Soanes, N. J. Talbot, CRISPR-Cas9  
548 ribonucleoprotein-mediated co-editing and counterselection in the rice blast fungus. *Sci. Rep.* **8**,  
549 1–12 (2018).
- 550 43. T. Leisen, F. Bietz, J. Werner, A. Wegner, U. Schaffrath, D. Scheuring, F. Willmund, A.  
551 Mosbach, G. Scalliet, M. Hahn, CRISPR/Cas with ribonucleoprotein complexes and transiently  
552 selected telomere vectors allows highly efficient marker-free and multiple genome editing in  
553 *Botrytis cinerea*. *PLoS Pathog.* **16**, 1–32 (2020).
- 554 44. P. Lemonnier, C. Gaillard, F. Veillet, J. Verbeke, R. Lemoine, P. Coutos-Thévenot, S. La  
555 Camera, Expression of *Arabidopsis* sugar transport protein STP13 differentially affects glucose  
556 transport activity and basal resistance to *Botrytis cinerea*. *Plant Mol. Biol.* **85**, 473–484 (2014).
- 557 45. D. Parker, M. Beckmann, H. Zubair, D. P. Enot, Z. Caracuel-Rios, D. P. Overy, S. Snowdon, N.  
558 J. Talbot, J. Draper, Metabolomic analysis reveals a common pattern of metabolic re-  
559 programming during invasion of three host plant species by *Magnaporthe grisea*. *Plant J.* **59**,  
560 723–737 (2009).
- 561 46. Q. Yuan, Y. Yan, M. A. Sohail, H. Liu, J. Huang, T. Hsiang, L. Zheng, A novel hexose  
562 transporter ChHxt6 is required for hexose uptake and virulence in *Colletotrichum higginsianum*.  
563 *Int. J. Mol. Sci.* **22** (2021), doi:10.3390/ijms22115963.
- 564 47. R. Zhang, N. Isozumib, M. Mori, R. Okuta, S. Singkaravanit-Ogawa, T. Imamura, P. Gan, K.  
565 Shirasu, S. Ohki, Y. Takano, *J. Biol. Chem.*, in press.
- 566 48. Y. Okegawa, K. Motohashi, A simple and ultra-low cost homemade seamless ligation cloning  
567 extract ( SLiCE ) as an alternative to a commercially available seamless DNA cloning kit. **4**, 148–  
568 151 (2015).
- 569 49. N. A. Shevchuk, A. V Bryksin, Y. A. Nusinovich, F. C. Cabello, M. Sutherland, S. Ladisch,  
570 Construction of long DNA molecules using long PCR-based fusion of several fragments  
571 simultaneously. *Nucleic Acids Res.* **32**, e19 (2004).

572

573

574

575

576

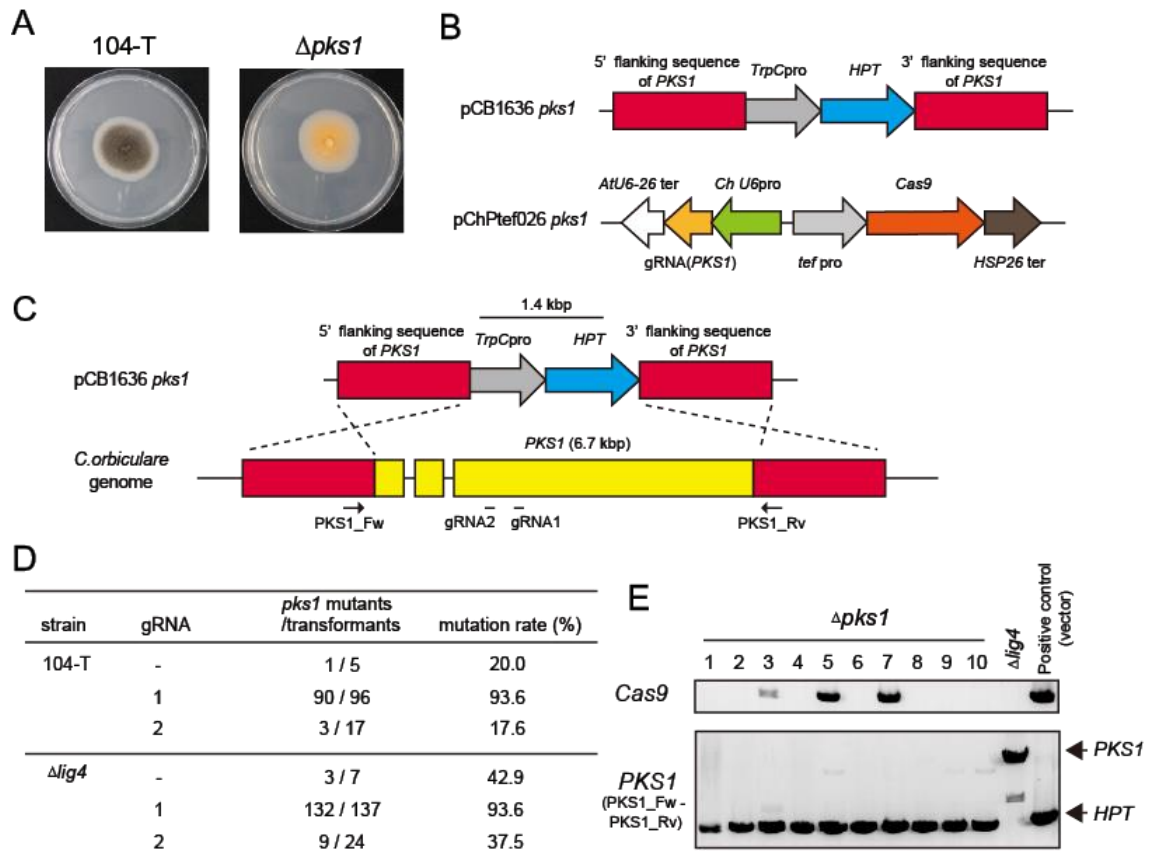

577

578

579 Fig.1, CRISPR/Cas9 system promotes gene-targeting efficiency in *C. orbiculare*.

580 A, Phenotype of *pks1* mutants. *pks1* mutants show orange color phenotype due to lack of melanin  
581 synthesis.

582 B, Vector information of the targeting vector pCB1636 *pks1* and the CRISPR/Cas9 vector pChPtef026  
583 *pks1*.

584 C, Scheme of gene disruption using the targeting vector pCB1636 *pks1*. The positions of gRNA were  
585 lined under *PKS1* locus.

586 D, Efficiency of establishment of *pks1* mutants using CRISPR/Cas9 system. Results of three  
587 independent experiments were combined.

588 E, Insertion of *Cas9* fragment in the genome of *pks1* mutants generated using pCB1636 *pks1* and  
589 pChPtef026 *pks1*.

590

591

592

593

594

595

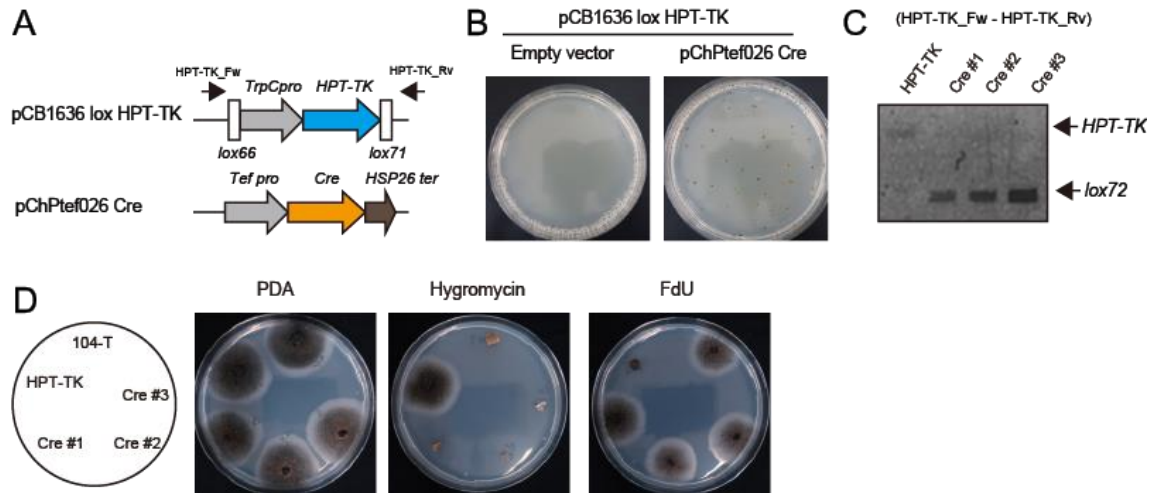

596

597

598 Fig.2 Cre/loxP system works in *C. orbiculare*.

599 A, Vector information of pCB1636 lox HPT-TK and pChPtef026 Cre.

600 B, The introduction of *thymidine kinase (TK)* gene led to inhibition of fungal growth on PDA  
601 containing FdU (left). Fungal colonies became observable after Cre introduction (right).

602 C, Cre removed the DNA fragments containing *HPT-TK* gene within *loxP* sequences.

603 D, Hygromycin resistance was lost in Cre-introduced strains.

604

605

606

607

608

609

610

611

612

613

614

615

616

617

618

619

620

621



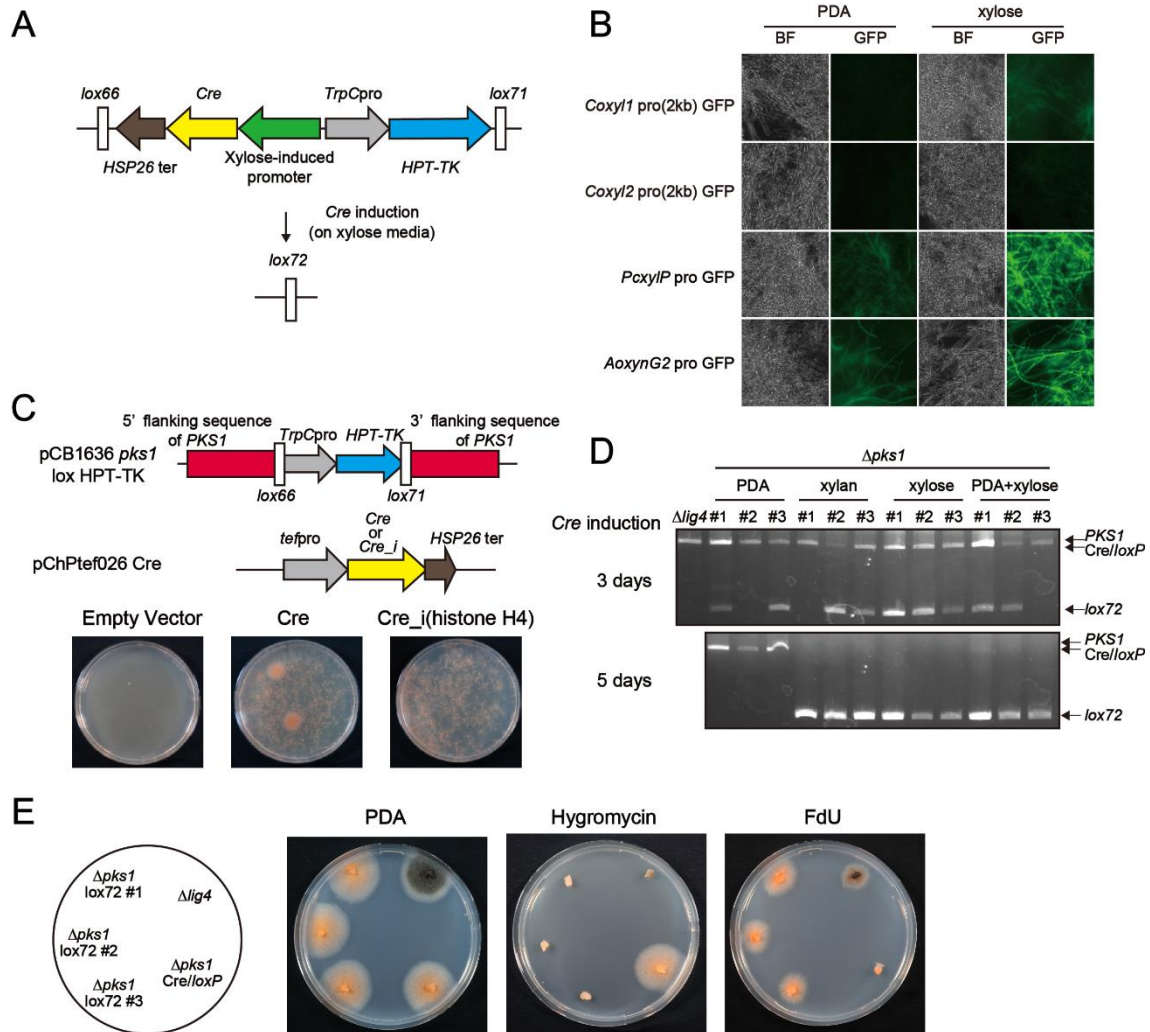

622

623 Fig.3 Establishment of a self-excision Cre/loxP system for *C. orbiculare*.

624 A. Scheme of a self-excision Cre/loxP system in this study. Cre gene is induced by a xylose-inducible  
625 promoter, leading to excision of the DNA fragment within loxP sites.

626 B. Xylose-inducibility of xylase gene promoters in *C. orbiculare*. BF indicates bright field.

627 C. The insertion of an intron did not affect functionality of Cre in *C. orbiculare*

628 D. Cre/loxP system is activated on media containing xylose or xylan. Cre removed Cre/loxP fragment,  
629 leading to generation of lox72 fragment.

630 E. Selective-marker cassette was successfully removed by Cre/loxP system.

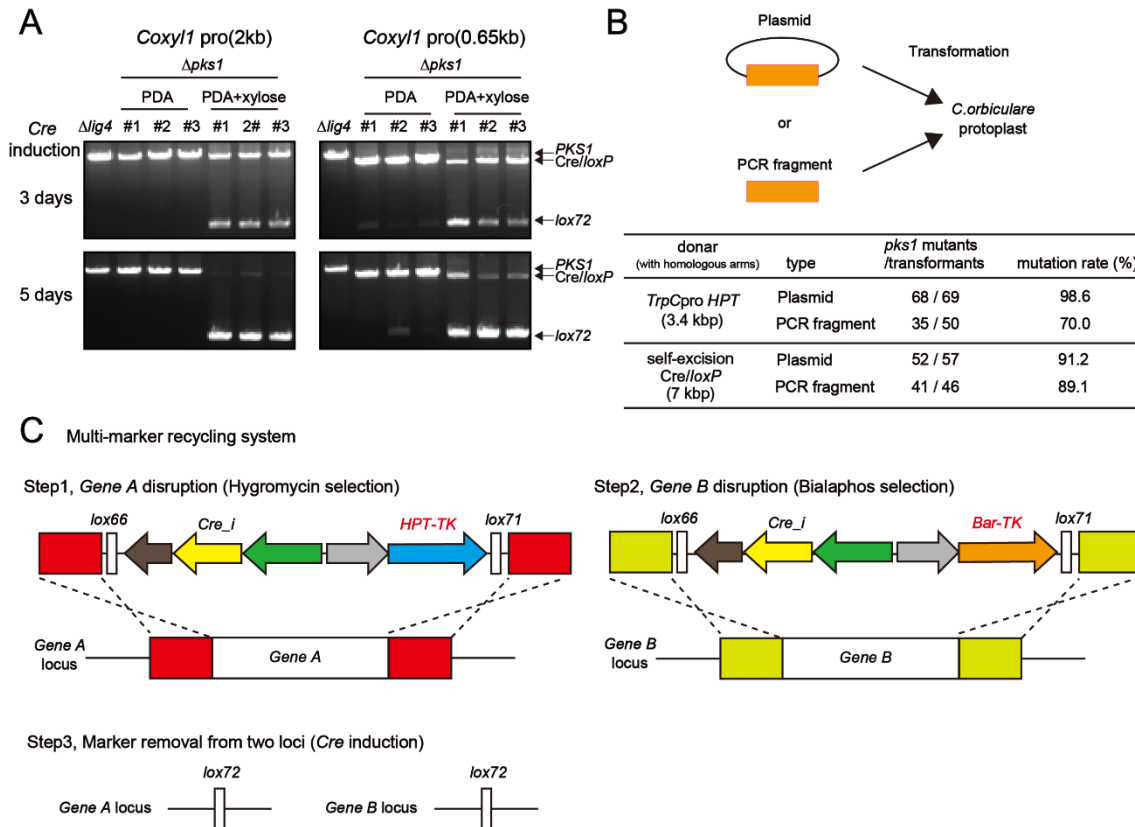

631

632 Fig.4 Improvement of self-excision *Cre/loxP* system.

633 A, A short fragment of *Coxyl1* promoter also worked for *Cre* induction in the presence of xylose in *C.*

634 *orbiculare*.

635 B, Introduction of PCR fragments is sufficient to generate KO strains. PCR fragments were

636 transformed with the CRISPR/Cas9 vector pChPtef026 containing *PKS1* gRNA1 into *C. orbiculare*

637 protoplasts.

638 C, A scheme of sequential gene disruption using multi-marker system with hygromycin-resistant gene

639 and bialaphos-resistance gene. The double KO mutants were incubated on xylose media to remove

640 selective marker cassettes from two loci.

641

642

643

644

645

646

647

648

649

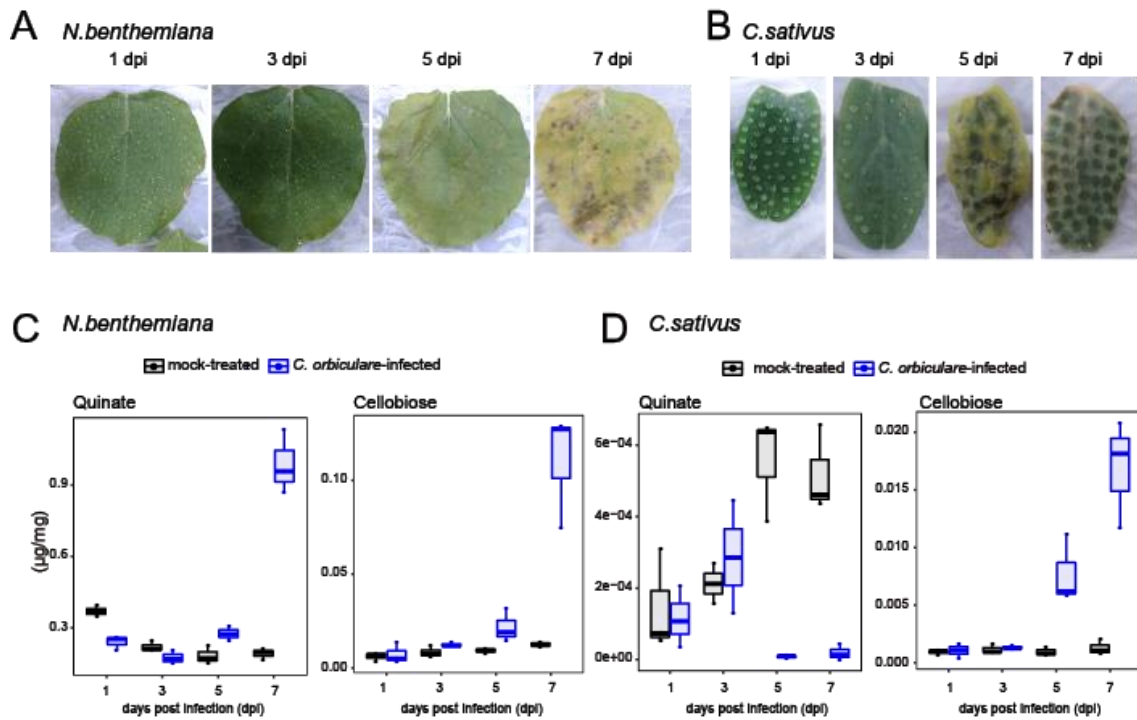

650  
651

652 Fig.5 Sugar amounts in leaves are altered during the infection of *C. orbiculare*  
653 A and B, The photograph of *N. benthamiana* leaves (A) and *C. sativus* cotyledons (B) during the  
654 infection of *C. orbiculare*.  
655 C and D, Quantification of quinate and cellobiose in *N. benthamiana* leaves (C) and *C. sativus*  
656 cotyledons (D) during the infection of *C. orbiculare*.

657  
658  
659  
660  
661  
662  
663  
664  
665  
666  
667  
668  
669  
670  
671

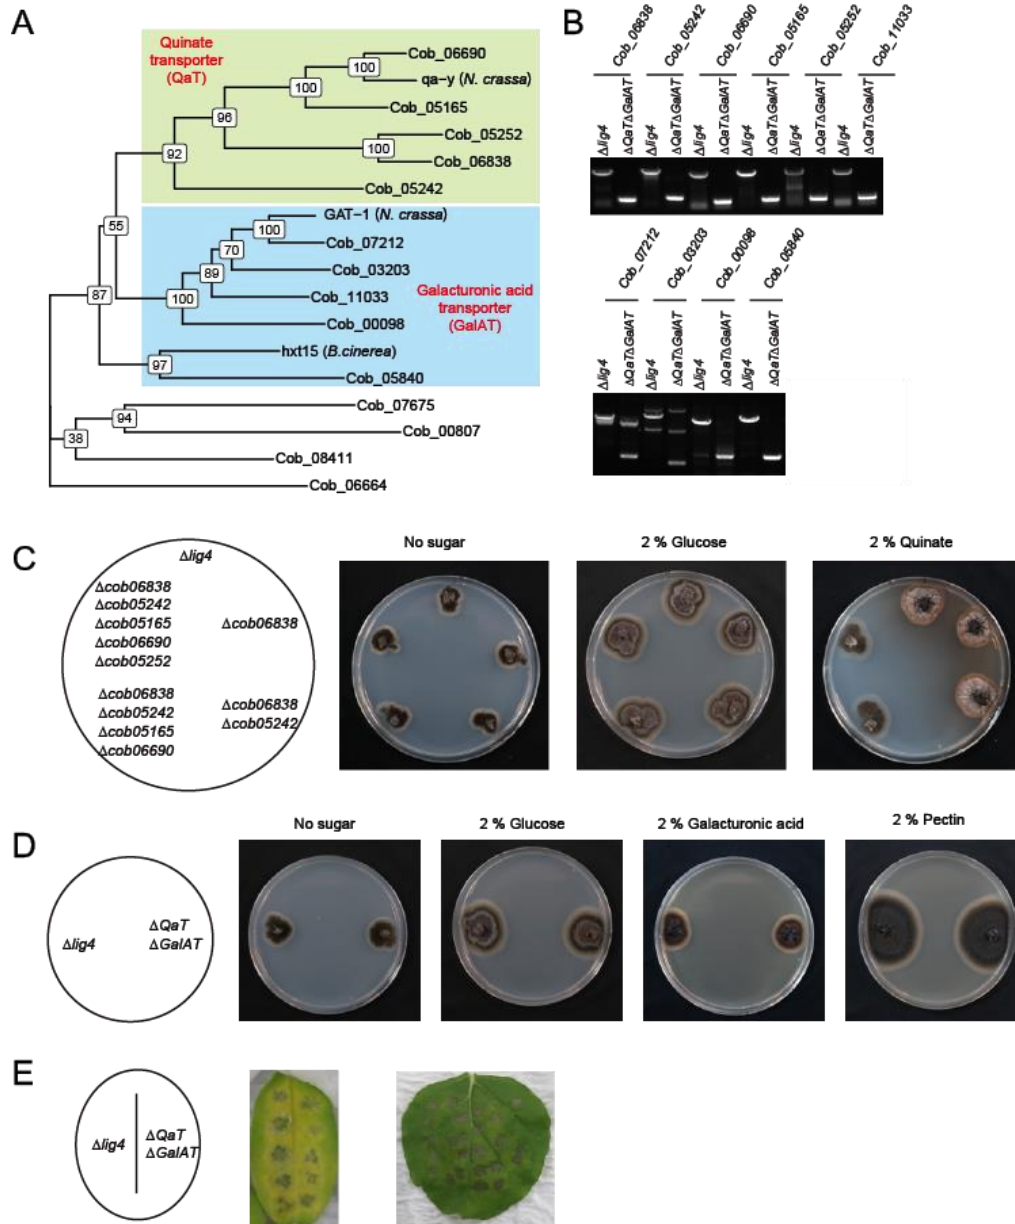

672 Fig.6 Identification of functional quinate transporters in *C. orbiculare*.  
 673 A, A maximum-likelihood tree of quinate transporters (QaTs) and galacturonic acid transporters  
 674 (GalATs) in *C. orbiculare* constructed by RaxML and gtree is shown. Numbers on each node  
 675 represent bootstrap values from 100 samplings.  
 676 B, Genotyping of 5 *QaT* genes and 5 *GalAT* genes disrupted by self-excision Cre/*loxP* system.  
 677 C, Loss of *QaT* genes restricted growth on quinate media, not glucose media.  
 678 D, Loss of 5 *GalAT* genes did not affect growth on media containing galacturonic acid or pectin  
 679 E, Loss of 5 *QaTs* and 5 *GalATs* did not affect virulence of *C. orbiculare*. The middle panel and the  
 680 right panel shows cotyledon of *C. sativas* and true leaf of *N. benthamiana*, respectively. *lig4* mutant  
 681 and *qat galat* mutant was inoculated on the left side and the right side, respectively, of infected leaves.

**A** Cellobiose transporter (CelT)

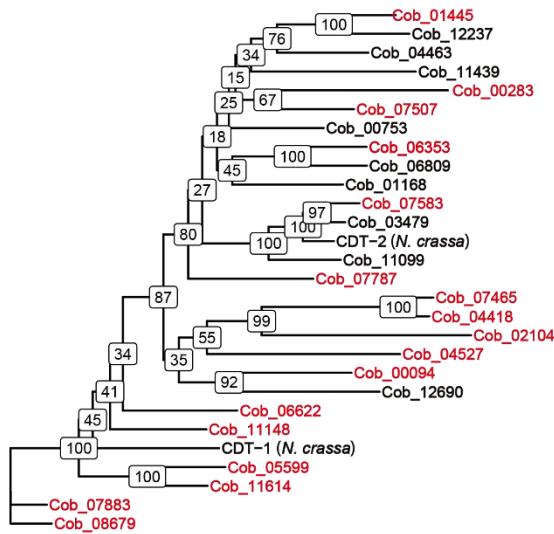

**C**

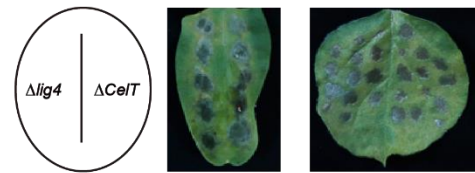

**B**

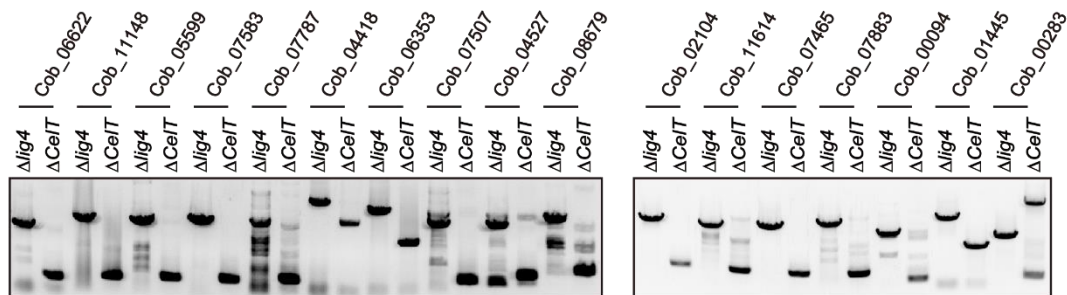

**D**

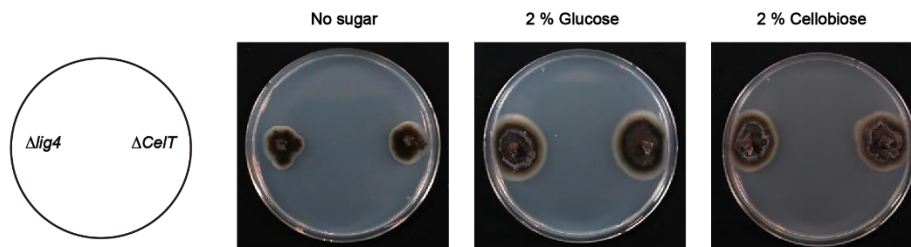

682

683 Fig.7 Disruption of cellobiose transporters in *C. orbiculare*.

684 A, maximum-likelihood tree of cellobiose transporters (CelTs) in *C. orbiculare* constructed by RaxML  
 685 and gtree is shown. Numbers on each node represent bootstrap values from 100 samplings. Genes  
 686 which are knocked out in this study were colored red.

687 B, Genotyping of 17 *CelT* genes disrupted by self-excision Cre/*loxP* system. The marker cassette used  
 688 for *Cob\_00283* locus was not removed.

689 C, Loss of 17 *CelT* genes did not affect virulence of *C. orbiculare*. The middle panel and the right  
 690 panel shows cotyledon of *C. sativas* and true leaf of *N. benthamiana*, respectively. *lig4* mutant and  
 691 *celt* mutant was inoculated on the left side and the right side, respectively, of infected leaves.

692 D, Loss of 17 *CelT* genes did not affect growth on media containing cellobiose as a sole carbon source.
